# Supplementary material for: Green synthesis of α-aminophosphonates using ZnO nanoparticles as an efficient catalyst
Source: publisher site journal article supplement (doi:10.1515/znb-2017-0177), 2018-03-19

# Supporting Information

**Elham Ezzatzadeh**

**Green synthesis of  $\alpha$ -aminophosphonates using ZnO nanoparticles as an efficient catalyst**

DOI: 10.1515/znb-2017-0177

Received October 6, 2017; accepted February 20, 2018

**Corresponding author: Dr. Elham Ezzatzadeh**, Department of Chemistry, Ardabil Branch, Islamic Azad University, Ardabil, I. R. Iran; e-mail:dr.ezzatzadeh@yahoo.com

## **General procedure for the preparation of 4a–4h**

To a stirred mixture of 1-(6-hydroxy-2-isopropenyl-1-benzofuran-yl)-1-ethanone **1** (0.43 g, 2 mmol), methyl amine **3a** (0.062 g, 2 mmol) and ZnO nanoparticles (0.016 g, 10 mol %) in water (5 mL) was added trimethyl phosphite **2a** (0.25 g, 2 mmol) after 15 min. After completion of the reaction [1 h; TLC (AcOEt-hexane 4:1)], the reaction mixture was filtered and the catalyst was washed with ethyl acetate. The solvent was evaporated from the mixture and the residue was purified by Et<sub>2</sub>O to afford pure compound **4a**. All other compounds were prepared by the same procedure.

$^1\text{H}$  NMR spectrum of **4a**

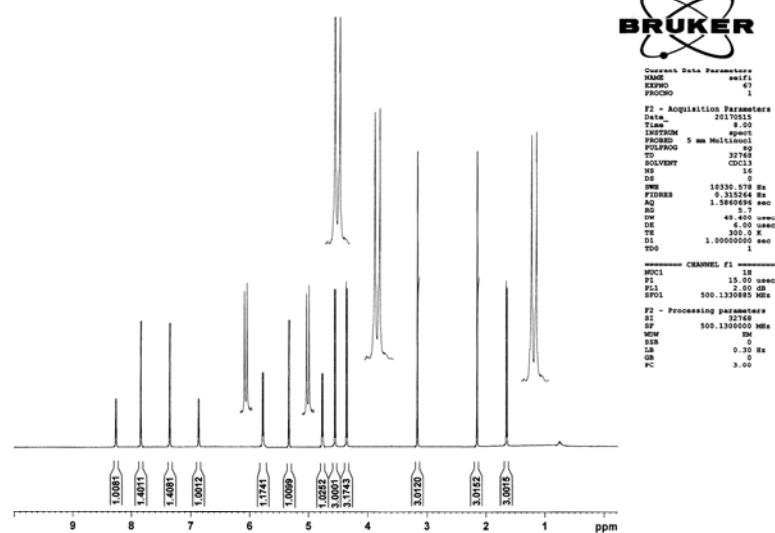

$^{31}\text{P}$  NMR spectrum of **4a**

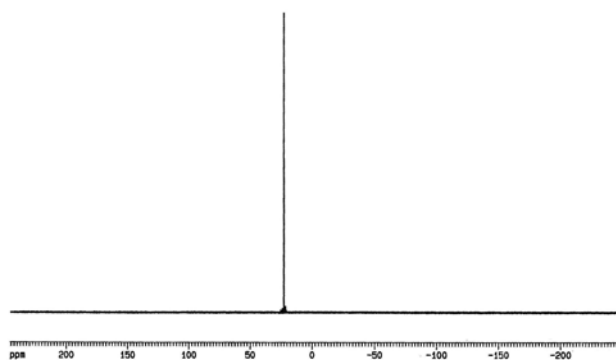

$^1\text{H}$  NMR spectrum of **4b**

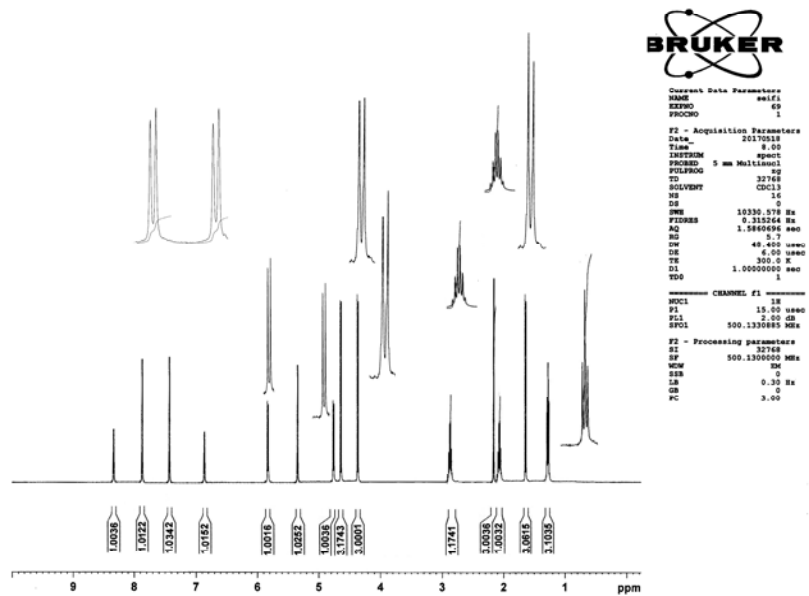

$^{31}\text{P}$  NMR spectrum of **4b**

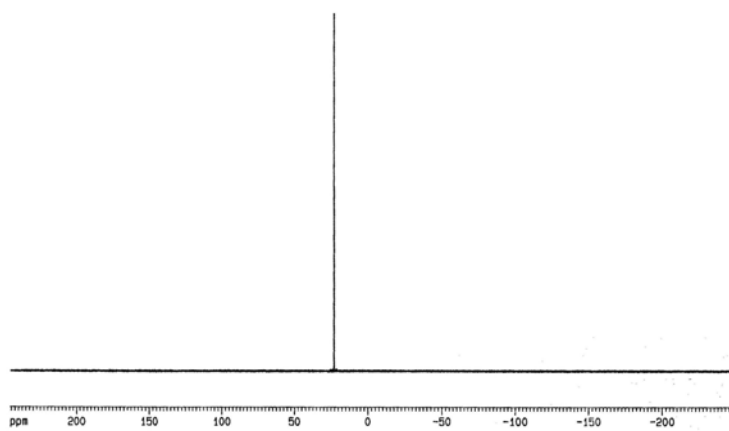

$^1\text{H}$  NMR spectrum of **4c**

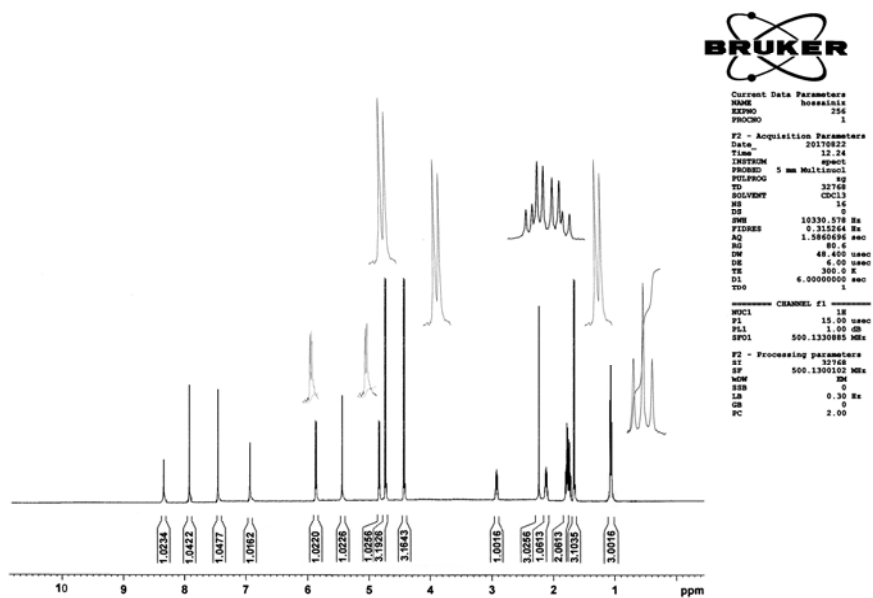

$^{31}\text{P}$  NMR spectrum of **4c**

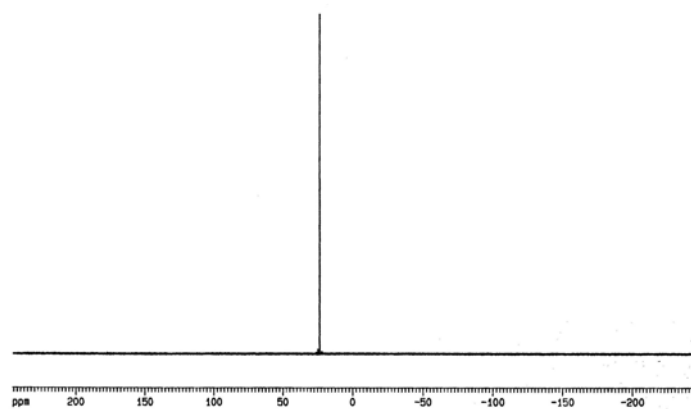

$^1\text{H}$  NMR spectrum of **4d**

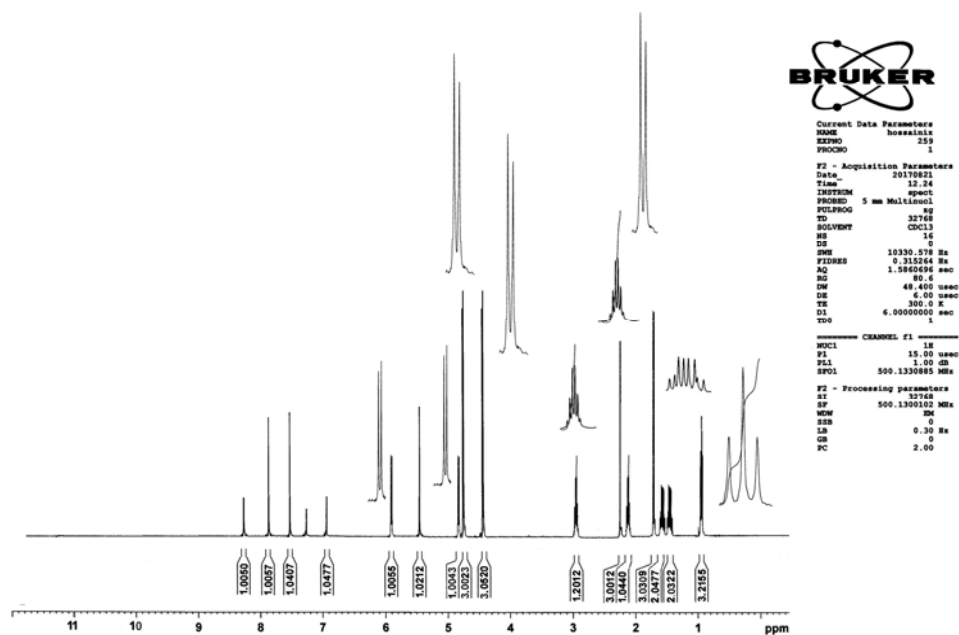

$^{31}\text{P}$  NMR spectrum of **4d**

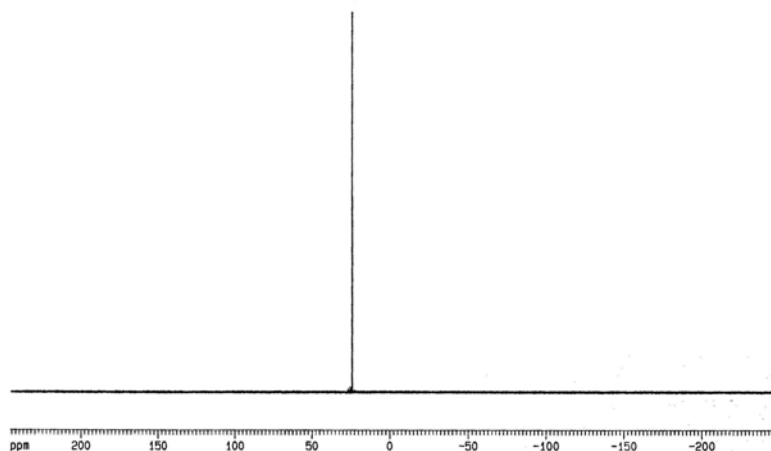

$^1\text{H}$  NMR spectrum of **4e**

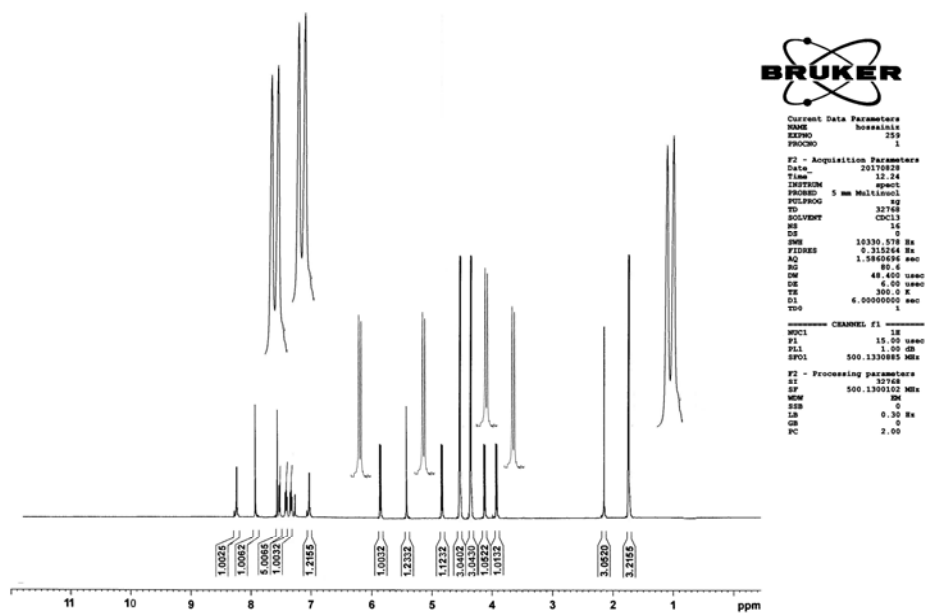

$^{31}\text{P}$  NMR spectrum of **4e**

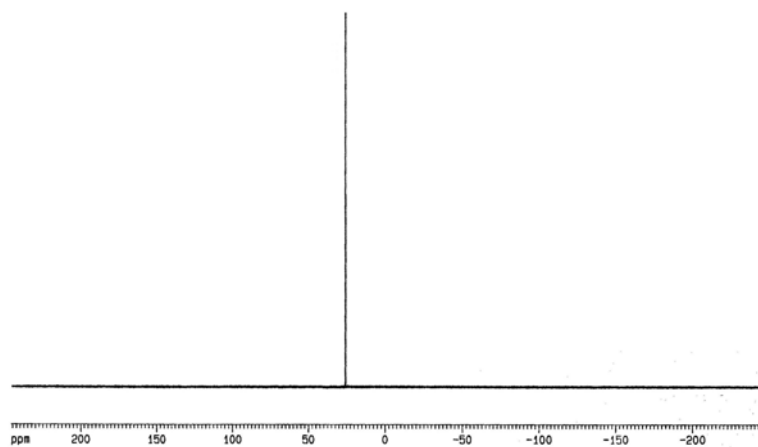

$^1\text{H}$  NMR spectrum of **4f**

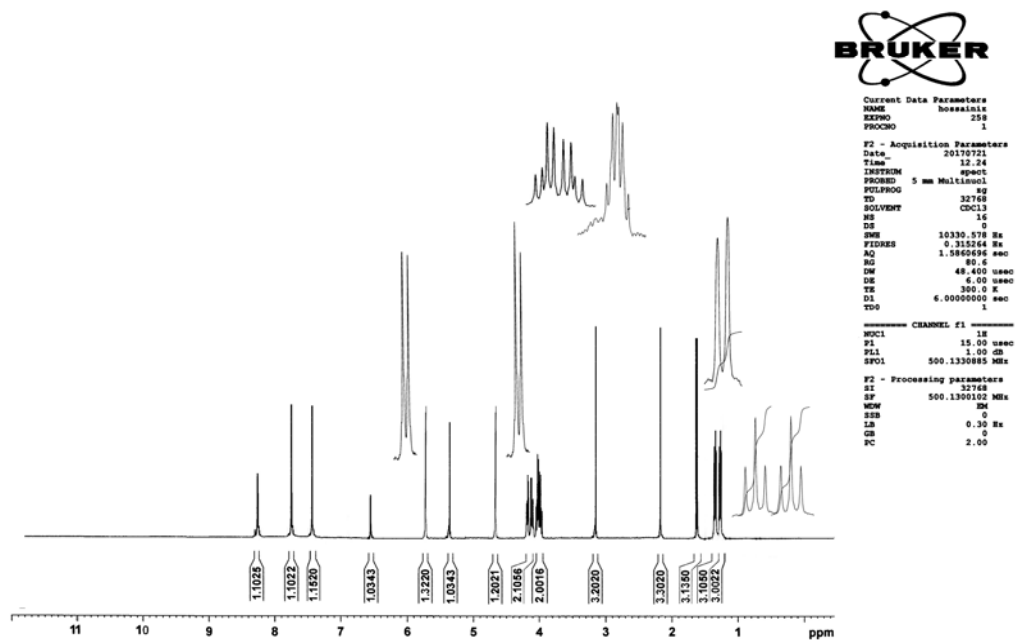

$^{31}\text{P}$  NMR spectrum of **4f**

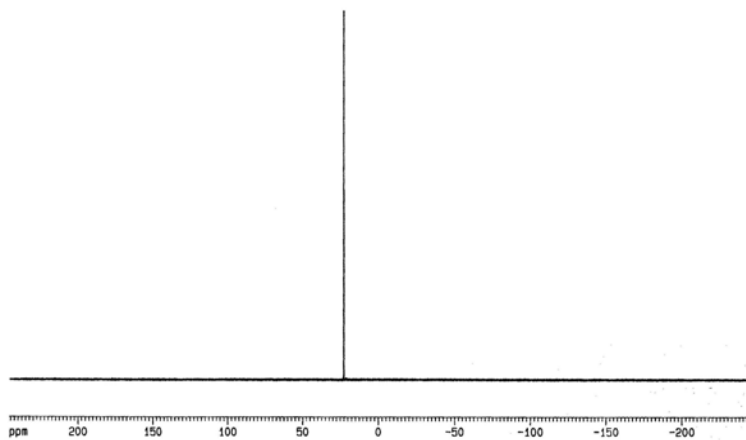

$^1\text{H}$  NMR spectrum of **4g**

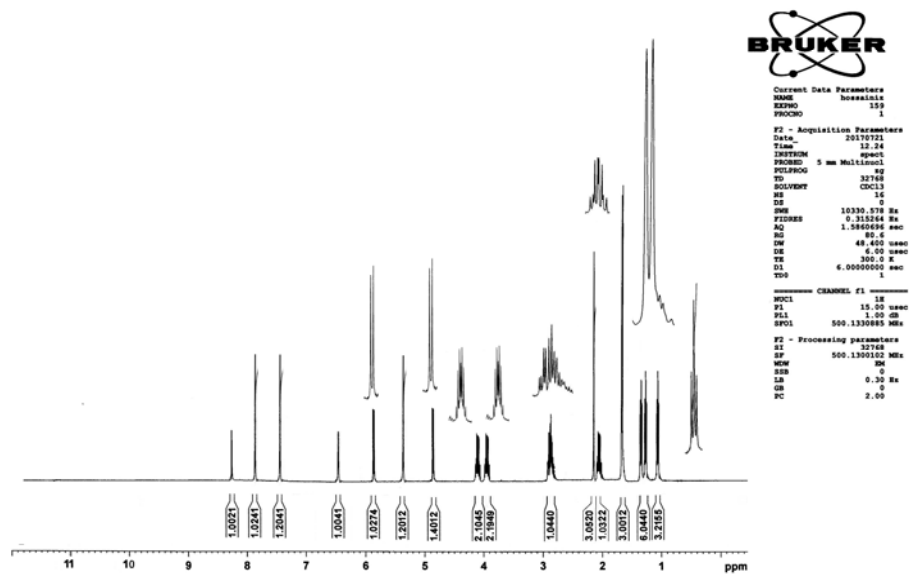

$^{31}\text{P}$  NMR spectrum of **4g**

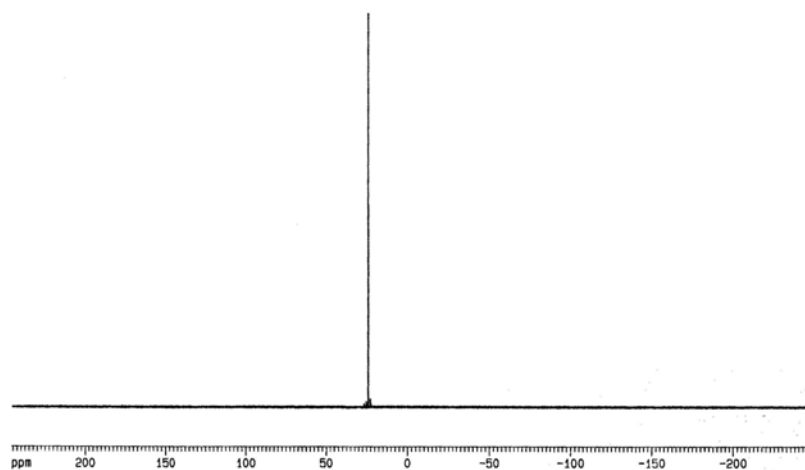



$^1\text{H}$  NMR spectrum of **4h**

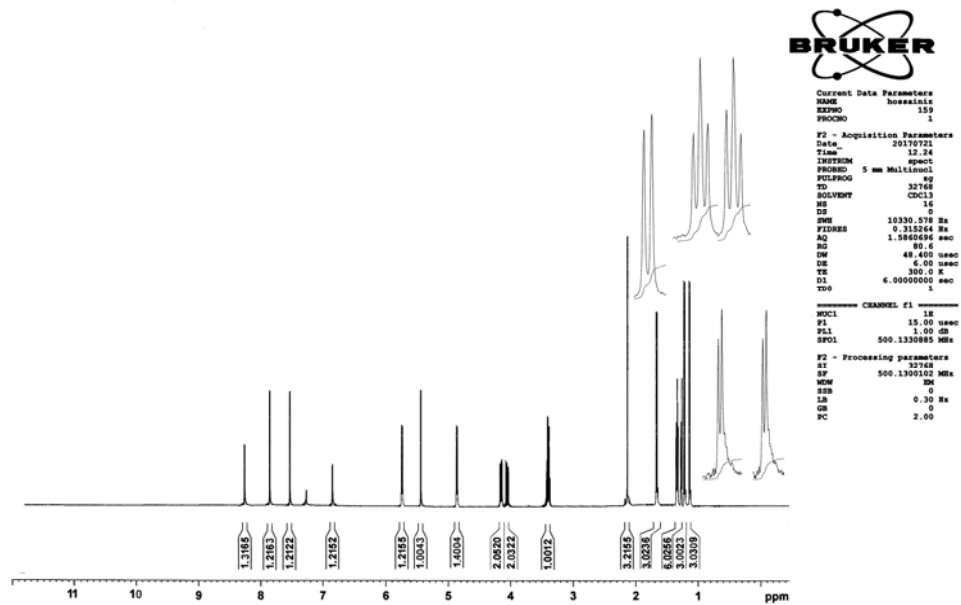

$^{31}\text{P}$  NMR spectrum of **4h**

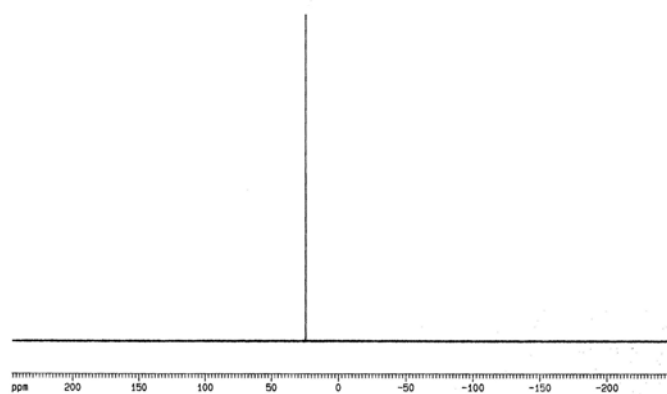

Supplement: Supplementary file 1 [file znb-2017-0177_suppl.pdf]
